# Supplementary material for: Tunable collective dynamics of ellipsoidal Quincke particles
Source: Royal Society of Chemistry journal article supplement (doi:10.1039/d2sm01238c), 2022-12-10
Supplement: d2sm01238c6.pdf [file d2sm01238c6.pdf]

## Tunable Collective Dynamics of Ellipsoidal Quincke Particles

Yu Chen,<sup>a,b</sup> Lei Wang,<sup>a,b\*</sup> Tian Hui Zhang<sup>a,b\*</sup>

<sup>a</sup>Center for Soft Condensed Matter Physics and Interdisciplinary Research, Soochow University, Suzhou, 215006, P. R. China

<sup>b</sup>School of Physical Science and Technology, Soochow University, Suzhou, 215006, P. R. China

### Supplementary Materials

In the unstable spinning state, the tilting of spinning axis leads to the procession of ellipsoidal Quincke particles. Therefore, the speed  $v$  is a result of the combination of spinning and procession as shown in SFig.1. In the absence of procession, the speed  $v$  is linearly dependent on the angular speed  $\Omega$  of spinning. This linear dependence results in the linear relation between  $v^2$  and  $(E/E_c)^2$ . However, the tilting and the procession distort the relation between  $v$  and  $\Omega$ , giving rise to the deviation from the linear dependence between  $v^2$  and  $(E/E_c)^2$ . The larger the tilting angle is, the far the deviation is. The tilting can be suppressed by increasing  $k$  or  $\Omega$ . Therefore, the linear relation between  $v^2$  and  $(E/E_c)^2$  is still well followed at large  $k$  and strong field  $E$ .

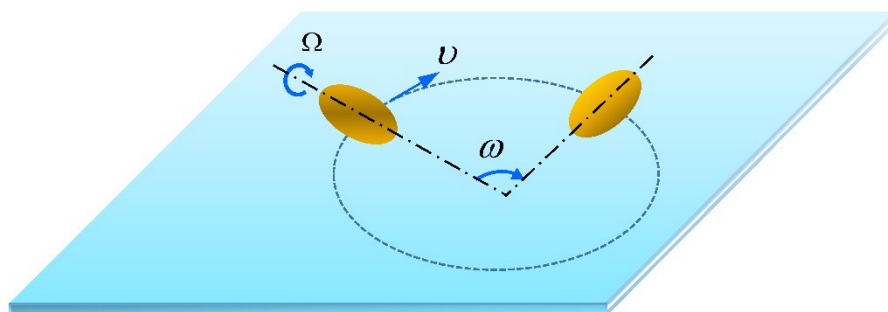

SFig. 1 Motion of ellipsoidal Quincke rollers in the unstable spinning state.

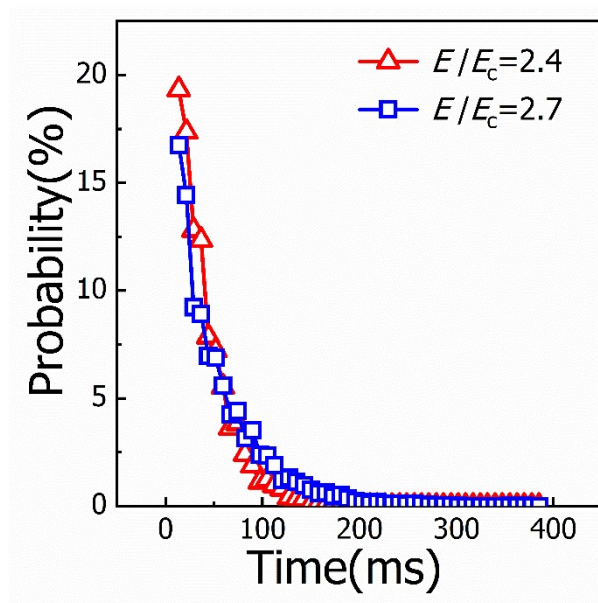

SFig. 2 Reorientation time of ellipsoidal Quincke particles in cluster phases. The aspect ratio  $k$  is 2.0. The global area fraction is 0.05.
